# Supplementary material for: Clinicopathological Profiles Associated with Discordant RAS Mutational Status between Liquid and Tissue Biopsies in a Real-World Cohort of Metastatic Colorectal Cancer
Source: MDPI journal article supplement (doi:10.3390/cancers15143578), 2023-07-12
Supplement: s1 [file s1]

## Supplementary Materials

Table S1. Concordance of *RAS* mutational status in patients with synchronous mCRC treated with tumour resection before the liquid biopsy extraction.

|                                         | N <sup>o</sup> | TP | TN | FP | FN | Concordance <sup>1</sup><br>95% CI | Sensitivity <sup>2</sup><br>95% CI | Specificity <sup>3</sup><br>95% CI | K <sup>4</sup><br>95% CI | OR<br>95% CI     | <i>p</i> -value |
|-----------------------------------------|----------------|----|----|----|----|------------------------------------|------------------------------------|------------------------------------|--------------------------|------------------|-----------------|
| Not tumour resection                    |                |    |    |    |    |                                    |                                    |                                    |                          |                  |                 |
|                                         | 122            | 60 | 50 | 6  | 6  | 90.2<br>83.6-94.3                  | 90.9<br>80.6-96.3                  | 89.3<br>77.4-95.6                  | 0.80<br>0.70-0.91        |                  |                 |
| Primary tumour resection                |                |    |    |    |    |                                    |                                    |                                    |                          |                  |                 |
|                                         | 77             | 39 | 28 | 2  | 8  | 87.0<br>77.7-92.8                  | 83.0<br>68.7-91.9                  | 93.3<br>76.5-98.8                  | 0.74<br>0.58-0.89        | 1.4<br>0.7 - 2.7 | 0.33            |
| Primary tumour and metastases resection |                |    |    |    |    |                                    |                                    |                                    |                          |                  |                 |
|                                         | 17             | 8  | 6  | 0  | 3  | 77.7<br>54.8-91.0                  | 72.7<br>39.3-92.7                  | 100.0<br>51.7-100.0                | 0.65<br>0.30-1.0         | 2.1<br>0.5 – 8.2 | 0.49            |

Table S1 includes information from 216 patients with synchronous metastases. Resection of Metastatic tumour tissue was performed in 8.33% of patients. True positive TP: Tissue *RAS* mutated/ctDNA *RAS* mutated; True negative TN: Tissue *RAS* wt/ctDNA *RAS* non-mutated; False positive FP: Tissue *RAS* wt/ctDNA *RAS* mutated; False negative FN: Tissue *RAS* mutated/ctDNA *RAS* non-mutated<sup>1</sup> Overall percentage agreement (95% Confidence Intervale); <sup>2</sup>Positive percentage agreement (95% Confidence Intervale);<sup>3</sup>Negative percentage agreement (95% Confidence Intervale); <sup>4</sup> Cohen's kappa coefficient (95% Confidence Intervale); <sup>5</sup> odds ratio (95% confidence interval)

Table S2. Effect of the resection of the primary tumour in the concordance of *RAS* mutational status of patients with synchronous metastases.

|                      | N <sup>o</sup> | TP | TN | FP | FN | Concordance <sup>1</sup><br>95% CI | Sensitivity <sup>2</sup><br>95% CI | Specificity <sup>3</sup><br>95% CI | K <sup>4</sup><br>95% CI |
|----------------------|----------------|----|----|----|----|------------------------------------|------------------------------------|------------------------------------|--------------------------|
| Not tumour resection |                |    |    |    |    |                                    |                                    |                                    |                          |
| Left                 | 40             | 18 | 19 | 1  | 2  | 92.5<br>80.1-97.4                  | 90.0<br>66.9-98.2                  | 95.0<br>73.1-99.7                  | 0.85<br>0.69-1.0         |
| Rectum               | 57             | 29 | 24 | 3  | 1  | 93.0<br>83.3-97.2                  | 96.7<br>80.9-99.8                  | 88.9<br>69.7-97.1                  | 0.86<br>0.73-0.99        |
| Right                | 19             | 10 | 6  | 2  | 1  | 84.2<br>62.4-94.5                  | 90.9<br>57.1-99.5                  | 75<br>35.6-95.5                    | 0.67<br>0.33-1.0         |
| Tumour resection     |                |    |    |    |    |                                    |                                    |                                    |                          |
| Left                 | 47             | 19 | 23 | 2  | 3  | 89.4<br>77.4-95.4                  | 86.4<br>64.0-96.4                  | 92.0<br>72.5-98.6                  | 0.79<br>0.61-0.96        |
| Rectum               | 15             | 9  | 4  | 0  | 2  | 86.7<br>62.1-96.3                  | 81.8<br>47.8-96.8                  | 100<br>39.6-100.0                  | 0.71<br>0.33-1.0         |
| Right                | 29             | 17 | 6  | 0  | 6  | 79.3<br>61.6-90.2                  | 73.9<br>51.3-88.9                  | 100<br>51.7-100.0                  | 0.54<br>0.21-0.87        |

Table S2 includes information from 216 patients with synchronous metastases. Rsection of the Primary tumour was performed in 43.5% of patients. True positive TP: Tissue *RAS* mutated/ctDNA *RAS* mutated; True negative TN: Tissue *RAS* wt/ctDNA *RAS* non-mutated; False positive FP: Tissue *RAS* wt/ctDNA *RAS* mutated; False negative FN: Tissue *RAS* mutated/ctDNA *RAS* non-mutated.<sup>1</sup> Overall percentage agreement (95% Confidence Intervale); <sup>2</sup>Positive percentage agreement (95% Confidence Intervale); <sup>3</sup>Negative percentage agreement (95% Confidence Intervale); <sup>4</sup> Cohen's kappa coefficient (95% Confidence Intervale)

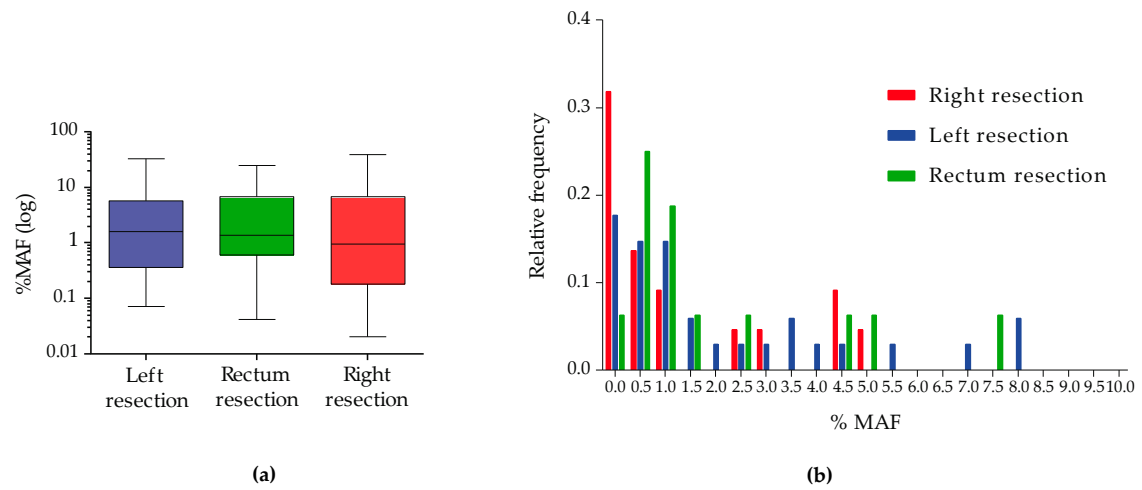

Figure S1. Impact of the resection of the primary tumour on the detection of plasmatic *RAS* mutations. (a) Plasmatic *RAS* MAF percentage in patients treated with tumour resection. Data included patients with synchronous and metachronous metastases. Box-Plots represent the 75<sup>th</sup> and 25<sup>th</sup> interquartile range. Y axis is log scale. X axis represents: Blue: ctDNA *RAS* MAFs from patients with mCRC originating in the left colon. Green: ctDNA *RAS* MAFs from patients with primary tumour located in the rectum. Red: ctDNA *RAS* MAFs from patients with right-sided mCRC. (b) Relative frequency distribution of the % MAFs in patients with mCRC originating in different sites of the colon and treated with tumour resection. Y axis represents the relative frequency of the %MAF in each mCRC population. X axis represents Bin centre. Bin width is of 0.05. Bin 1 includes all % MAFs below 0.25%. Only MAFs below 10% are plotted in the graph
